# Supplementary material for: Altered Functional Connectivity of Basal Ganglia in Mild Cognitive Impairment and Alzheimer’s Disease
Source: MDPI journal article supplement (doi:10.3390/brainsci12111555), 2022-11-15
Supplement: s1

**Table S1.FCD among-group comparison in the AD,MCI and NC groups (voxel-level  $p < 0.05$ , cluster-level  $p < 0.05$ , GRF corrected)**

| Conditions  | Region     | Brodmann's Area | Montreal Neurologic Institute Coordinates | T value | Cluster (Voxels) |
|-------------|------------|-----------------|-------------------------------------------|---------|------------------|
| MCI VS NC   |            |                 |                                           |         |                  |
| Short-range | Caudate_R  | -               | (15,-9,19)                                | 2.6643  | 35               |
|             | Caudate_L  | -               | (-19,-17,22)                              | 2.0899  | 7                |
|             | Putamen_R  | BA48            | (33,-10,-1)                               | 2.9346  | 32               |
|             | Putamen_L  | BA48            | (-29,-13,6)                               | 2.4678  | 19               |
|             | Amygdala_R | BA34            | (22,-3,-17)                               | 2.9021  | 24               |
|             | Pallidum_R | -               | (29,-9,-3)                                | 2.2932  | 14               |
| AD VS NC    |            |                 |                                           |         |                  |
| Long-range  | Caudate_L  | -               | (-7,6,11)                                 | -3.2014 | 67               |
|             | Pallidum_R | BA48            | (21,-3,-3)                                | -2.3434 | 8                |

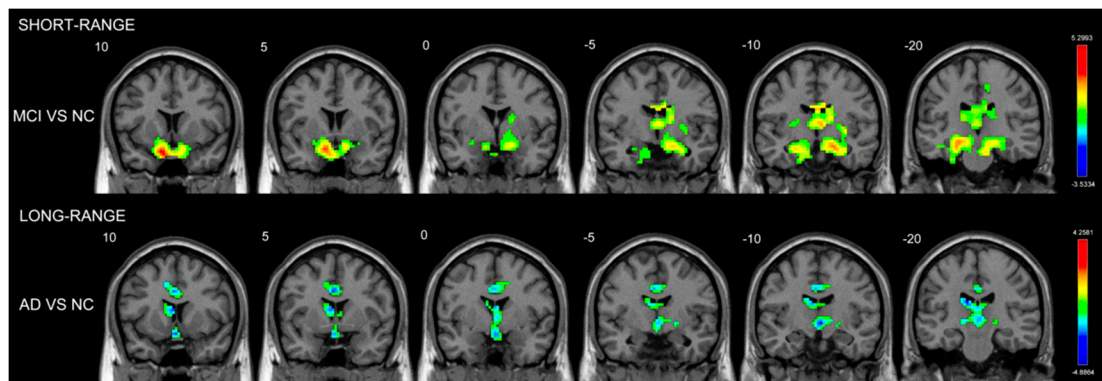

**Figure S1. Brain regions with significant differences in FCD (voxel-level  $p < 0.05$ , cluster-level  $p < 0.05$ , GRF corrected) among the AD, MCI and NC groups.**
